# Supplementary material
Source: MDPI journal article supplement (https://www.mdpi.com/2073-4395/10/8/1162)
Supplement: s1 [file s1]

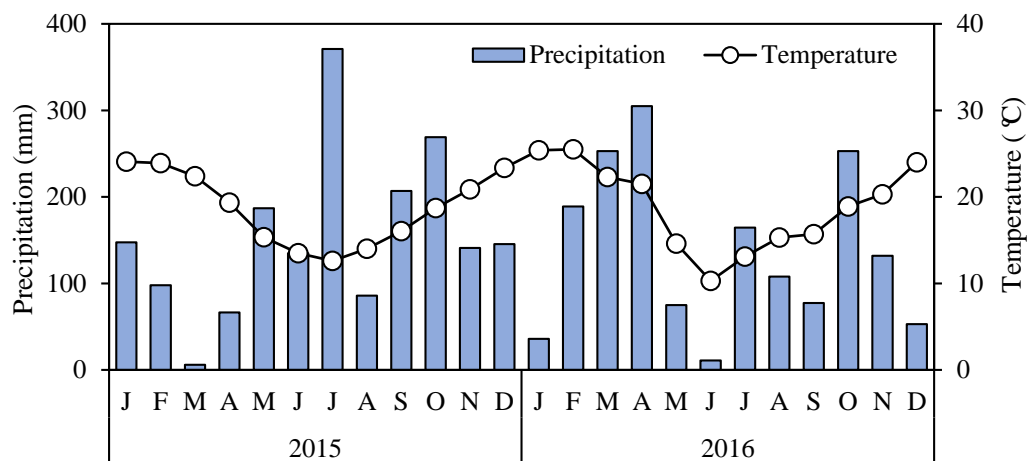

**Supplementary Figure S1.:** Monthly average precipitation and temperature (2015 and 2016) in a long-term experiment of integrated crop-livestock system in southern Brazil. Source: Experimental Station of the Federal University of Rio Grande do Sul, Eldorado do Sul, Rio Grande do Sul State, Brazil.

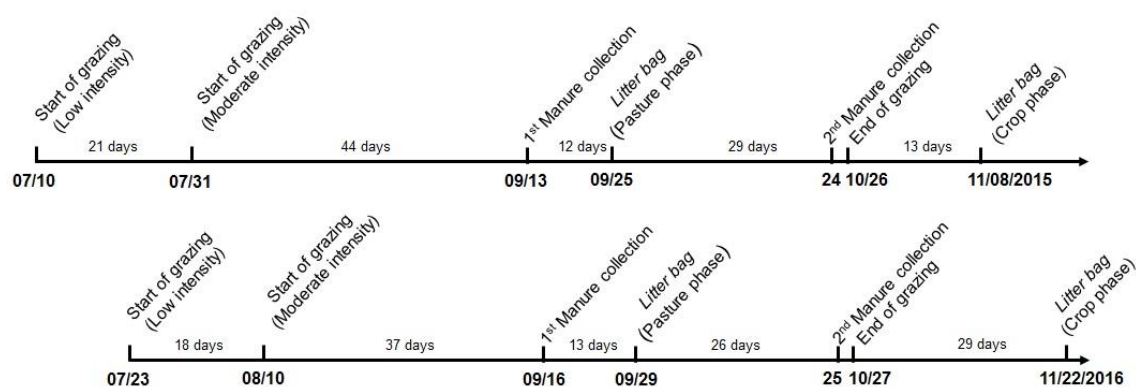

**Supplementary Figure S2.:** Starting and ending dates of the stocking period, manure collection and litter bag allocation dates in 2015 and 2016 winter stocking periods of the no-till integrated soybean-sheep production system.
